# Supplementary material for: Overcoming regional limitations: transfer learning for cross-regional microbial-based diagnosis of diseases
Source: PubMed Central journal article supplement — Gut. 2022 Oct 28;72(10):2004–6. doi: 10.1136/gutjnl-2022-328216 (PMC10511966; doi:10.1136/gutjnl-2022-328216), 2022-10-28
Supplement: gutjnl-2022-328216supp001.pdf [file gutjnl-2022-328216supp001.pdf]

1 **Supplemental information**

2

3 **Overcoming regional limitations: Transfer learning for cross-regional**  
4 **microbial-based diagnosis of diseases**

5

6 Nan Wang, Mingyue Cheng, Kang Ning\*

7

8 Key Laboratory of Molecular Biophysics of the Ministry of Education, Hubei Key  
9 Laboratory of Bioinformatics and Molecular-imaging, Center of AI Biology,  
10 Department of Bioinformatics and Systems Biology, College of Life Science and  
11 Technology, Huazhong University of Science and Technology, Wuhan 430074, Hubei,  
12 China.

13

14 \*Correspondence to Dr Kang Ning, E-mail: ningkang@hust.edu.cn.

## 15 **Analysis of the intercontinental cohort**

16 To validate the advantage of our proposed transfer learning approach, we also applied  
17 it on the dataset used by Clooney *et al*<sup>1</sup> (EBI accession number PRJNA414072). The  
18 dataset contained samples from intercontinental regions: Ireland (Irish, 118 Crohn's  
19 disease patients, 84 Ulcerative colitis patients and 84 controls) and Canada (Canadian,  
20 197 CD patients, 167 UD patients and 79 controls). Samples from each country were  
21 randomly divided into training subset (70%) and testing subset (30%). As shown in the  
22 Supplemental Figure S3, the independent DNN model has shown the AUROC of 0.872  
23 (Irish), 0.822 (Canadian), respectively. The AUROC values of the regional DNN  
24 models were 0.568 (Irish to Canadian) and 0.551 (Canadian to Irish), respectively (as  
25 shown in **Supplemental Figure S3A**). Notably, the AUROC values of the transfer DNN  
26 models were increased to 0.867 (Irish to Canadian) and 0.823 (Canadian to Irish),  
27 respectively (as shown in **Supplemental Figure S3B**).

28

29 We have also applied it on another intercontinental cohort for cross-regional disease  
30 diagnosis. We chose an irritable bowel syndrome cohort including samples from three  
31 continents obtained from the American Gut Project<sup>2</sup> (EBI accession number  
32 PRJEB11419). This dataset includes samples from United States of America (USA,  
33 with 464 controls and 245 IBS patients), United Kingdom (UK, with 120 controls and  
34 118 IBS patients) and Australia (AUS, with 23 controls and 17 IBS patients). Samples  
35 from each country were randomly divided into training subset (70%) and testing subset  
36 (30%). As shown in the Supplemental Figure S4, the independent DNN model of each  
37 country was constructed on its training subset and tested on the testing subset, showing  
38 the AUROC of 0.725 (USA), 0.559 (UK) and 0.978 (AUS). We then used testing subset  
39 of the countries with a smaller dataset to test the transfer DNN model. The transfer  
40 DNN models showed AUROC of 0.721 (USA to UK), 0.836 (USA to AUS) and 0.697  
41 (UK to AUS), higher than that of the regional DNN models with 0.584 (USA to UK),  
42 0.766 (USA to AUS) and 0.234 (UK to AUS), respectively.

43

44 These results showed that even if applied to intercontinental cohorts, transfer learning  
45 could improve the prediction ability across regions, thereby exceeding the limitation on  
46 microbial-based diagnosis of diseases across regions.

47

#### 48 **Leave-one-feature-out analysis**

49 Each of microbial features was removed in turn when constructing the transfer DNN  
50 model, then the change of the AUROC of the transfer DNN model was calculated.  
51 Microbes with the strongest change of the AUROC (top 2) would be designated as  
52 “region-specific”. On the contrary, the microbes with the least change of the AUROC  
53 (top 2) would be designated as “shared across all regions”.

54

#### 55 **Statistical analyses**

56 Mann-Whitney-Wilcoxon test was used to test the statistical significance of the  
57 differences in AUROC among independent DNN model, the regional DNN model and  
58 the transfer DNN model.

59

#### 60 **Codes and models availability**

61 The pre-trained models and source codes of scripts for training, querying and transfer  
62 learning are made publicly available at [https://github.com/HUST-NingKang-](https://github.com/HUST-NingKang-Lab/EXPERT-Disease-GGMP)  
63 [Lab/EXPERT-Disease-GGMP](https://github.com/HUST-NingKang-Lab/EXPERT-Disease-GGMP). The program “EXPERT” is available at  
64 <https://github.com/HUST-NingKang-Lab/EXPERT>.

65 **Supplemental figures**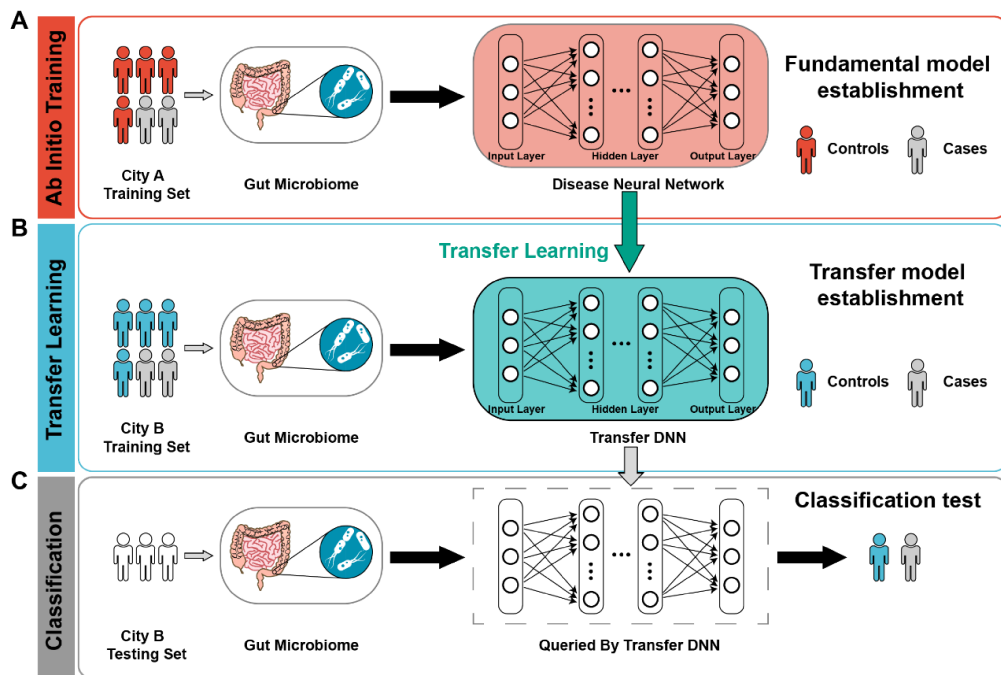

66

67 **Supplemental Figure S1** The transfer learning workflow of microbial-based cross-  
 68 regional diagnosis of diseases. (A) Fundamental model establishment: *ab initio* training  
 69 the DNN model on the training subset of city A. (B) Transfer model establishment:  
 70 implement transfer learning to generate a transfer DNN model for another city B by  
 71 using part of the training subset of city B. (C) Classification test: test the transfer DNN  
 72 model on the testing subset of city B. DNN, disease neural network.

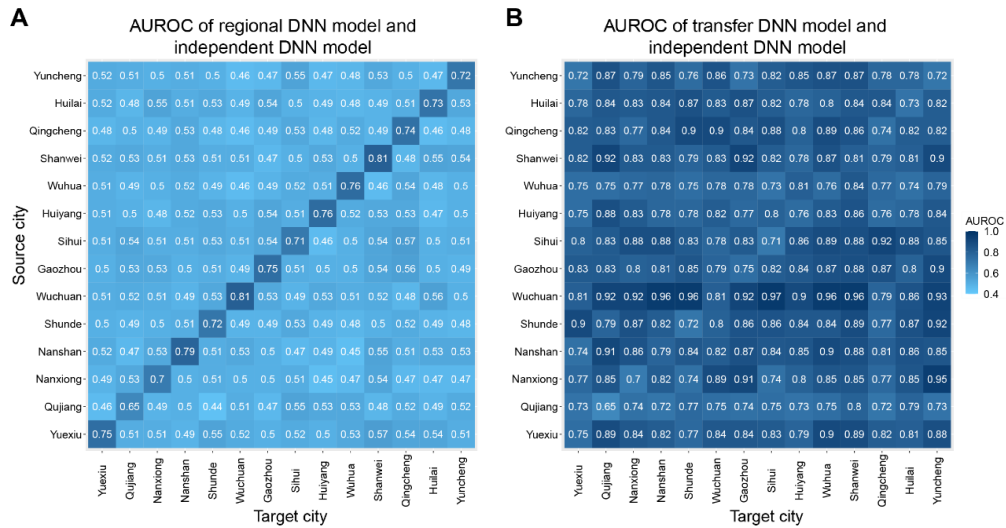

73

74 **Supplemental Figure S2** Average AUROC of three DNN models for cross-regional  
 75 disease diagnosis. In both heatmaps, the average AUROC of the independent DNN  
 76 model on seven diseases across 14 cities was shown in the diagonal (A and B). The  
 77 average AUROC of the regional DNN model on seven diseases across 14 cities was  
 78 shown in the area outside of the diagonal. The average AUROC of the transfer DNN  
 79 model on seven diseases across 14 cities was shown in the area outside of the diagonal  
 80 (B). AUROC, area under the receiver operating characteristic curve; DNN, disease  
 81 neural network.

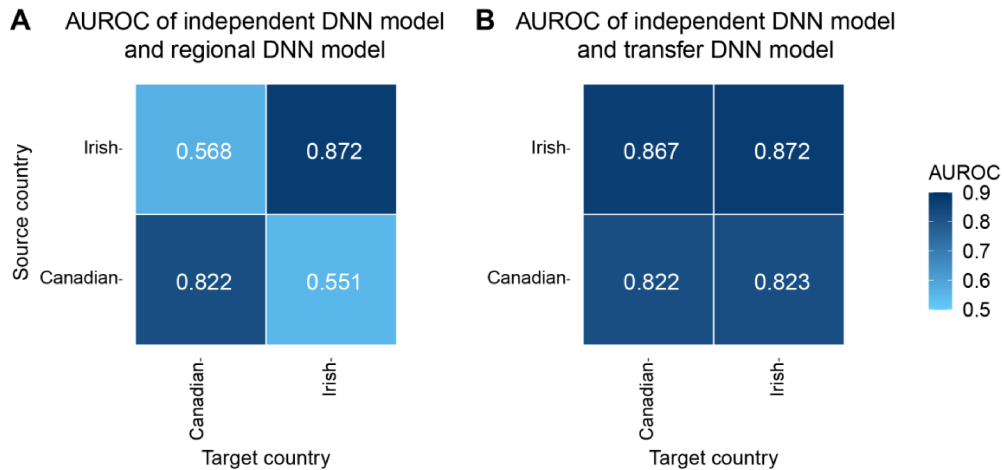

82

83 **Supplemental Figure S3.** Results of disease diagnosis across intercontinental regions.

84 In both heatmaps, the AUROC values of the independent DNN model on IBD across

85 two countries were shown in the diagonal (A and B). The AUROC values of the regional

86 DNN model on IBD across two countries were shown in the area outside of the diagonal

87 (A). The AUROC values of the transfer DNN model on IBD across two countries were

88 shown in the area outside of the diagonal (B). AUROC, area under the receiver

89 operating characteristic curve; IBD: inflammatory bowel disease; DNN, disease neural

90 network.

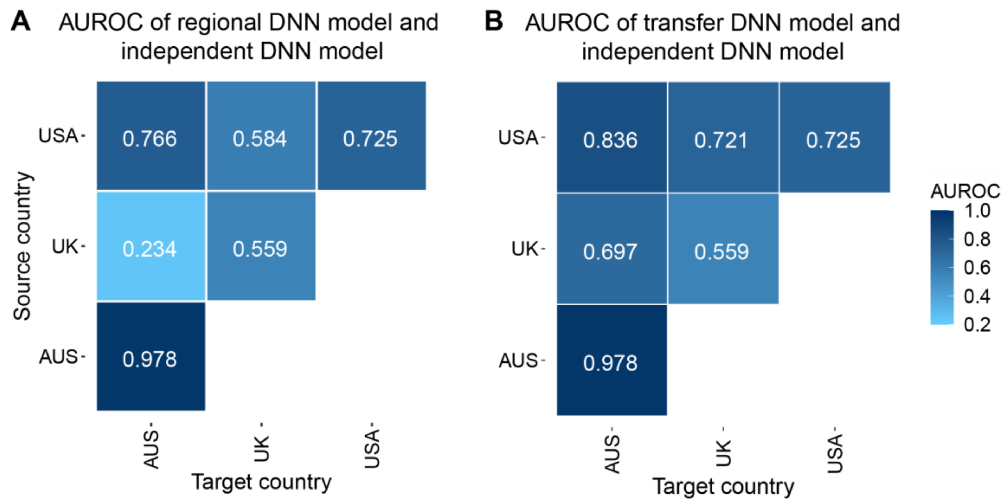

91

92 **Supplemental Figure S4.** Results of disease diagnosis across intercontinental regions.

93 In both heatmaps, the AUROC values of the independent DNN model on IBS across  
94 three countries were shown in the diagonal (A and B). The AUROC values of the  
95 regional DNN model on IBS across three countries were shown in the area outside of  
96 the diagonal (A). The AUROC values of the transfer DNN model on IBS across three  
97 countries were shown in the area outside of the diagonal (B). AUROC, area under the  
98 receiver operating characteristic curve; IBS: irritable bowel syndrome; DNN, disease  
99 neural network.

## Supplemental tables

**Supplemental Table S1. The number of cases and controls of each city and each disease.**

| City      | Control | Constipation | COPD | Gastritis | Kidneystone | MS  | RA  | T2D | Total number of participants |
|-----------|---------|--------------|------|-----------|-------------|-----|-----|-----|------------------------------|
| Yuexiu    | 261     | 51           | 41   | 74        | 50          | 158 | 38  | 92  | 448                          |
| Qujiang   | 214     | 54           | 31   | 154       | 130         | 207 | 166 | 112 | 488                          |
| Nanxiong  | 306     | 51           | 60   | 173       | 130         | 176 | 35  | 89  | 590                          |
| Nanshan   | 295     | 104          | 50   | 177       | 127         | 269 | 58  | 124 | 618                          |
| Shunde    | 189     | 45           | 36   | 117       | 53          | 122 | 55  | 49  | 362                          |
| Wuchuan   | 333     | 83           | 38   | 77        | 35          | 79  | 36  | 63  | 533                          |
| Gaozhou   | 254     | 41           | 57   | 173       | 73          | 142 | 48  | 109 | 509                          |
| Sihui     | 256     | 39           | 28   | 79        | 66          | 129 | 91  | 55  | 453                          |
| Huiyang   | 232     | 49           | 43   | 93        | 105         | 179 | 102 | 99  | 444                          |
| Wuhua     | 207     | 51           | 37   | 258       | 184         | 246 | 111 | 160 | 500                          |
| Shanwei   | 227     | 80           | 24   | 119       | 40          | 148 | 69  | 64  | 415                          |
| Qingcheng | 308     | 60           | 32   | 129       | 108         | 191 | 41  | 73  | 577                          |
| Huilai    | 247     | 80           | 63   | 171       | 8           | 220 | 172 | 113 | 506                          |
| Yuncheng  | 285     | 69           | 49   | 148       | 159         | 215 | 89  | 117 | 555                          |

*Note* : COPD, Chronic obstructive pulmonary disease; MS, Metabolic syndrome; RA, Rheumatoid arthritis; T2D, Type 2 diabetes.



**Supplemental Table S2. Transfer learning identifies the region-specific microbes, as well as microbes shared across all regions.**

| <b>Taxonomy</b>    | <b>Constipation</b> | <b>COPD</b> | <b>Gastritis</b> | <b>Kidneystone</b> | <b>MS</b> | <b>RA</b> | <b>T2D</b> | <b>Variance</b> |
|--------------------|---------------------|-------------|------------------|--------------------|-----------|-----------|------------|-----------------|
| Roseburia          | 0.1079              | -0.0215     | -0.0885          | 0.1647             | -0.0571   | 0.1437    | 0.1037     | 0.0107          |
| Faecalibacterium   | 0.0587              | -0.0052     | 0.0244           | 0.0744             | -0.0419   | 0.0746    | 0.0332     | 0.0019          |
| Enterobacteriaceae | 0.2183              | 0.1223      | -0.0316          | 0.1898             | -0.2073   | 0.0835    | 0.3342     | 0.0316          |
| Bacteroides        | -0.0299             | 0.1740      | -0.0886          | 0.1092             | -0.0308   | 0.2233    | 0.0645     | 0.0134          |
| Lachnospiraceae    | 0.0488              | 0.0245      | -0.0287          | 0.1413             | -0.0982   | 0.1019    | 0.1056     | 0.0071          |
| Oscillospira       | 0.0670              | 0.0081      | 0.0127           | -0.0468            | -0.0114   | 0.1329    | 0.1409     | 0.0052          |
| Parabacteroides    | 0.0094              | 0.1030      | 0.0045           | 0.0706             | -0.0201   | 0.0588    | 0.0671     | 0.0020          |
| Prevotella         | 0.1656              | 0.0089      | 0.0825           | 0.1081             | -0.0243   | 0.0231    | 0.2330     | 0.0084          |
| Clostridium        | 0.0227              | -0.0439     | -0.0829          | -0.0499            | 0.0005    | -0.0183   | 0.3116     | 0.0177          |
| Ruminococcus       | 0.1347              | -0.0094     | -0.0082          | 0.1081             | 0.0167    | 0.1460    | 0.1002     | 0.0046          |

10 region-specific microbes, as well as microbes shared across all regions were filtered out by using the "leave-one-out" analysis. The values represent the change of AUROC of the transfer DNN model used for the diagnosis of the seven diseases after removing the microbe. The positive value indicates that the microbe has a positive effect on the prediction, conversely, the microbe has a negative effect. The variance of these values are also displayed. DNN, disease neural network.

*Note* : COPD, Chronic obstructive pulmonary disease; MS, Metabolic syndrome; RA, Rheumatoid arthritis; T2D, Type 2 diabetes.

100 **References**

101 1. Clooney AG, Eckenberger J, Laserna-Mendieta E, et al. Ranking microbiome  
102 variance in inflammatory bowel disease: a large longitudinal intercontinental  
103 study. *Gut* 2021;70(3):499–510.

104 2. McDonald D, Hyde E, Debelius Justine W, et al. American Gut: an Open Platform  
105 for Citizen Science Microbiome Research. *mSystems* 2018;3(3):e00031–18.

106
